# Supplementary material for: Vein of Galen aneurysmal malformation: does size affect outcome?
Source: PubMed Central journal article supplement (PMC11133167; doi:10.1007/s00234-024-03347-6), 2024-04-12
Supplement: 234_2024_3347_MOESM1_ESM.pdf [file 234_2024_3347_MOESM1_ESM.pdf]

## Online Resource 1

**Supplementary Table 1. Magnetic resonance imaging parameters for the study protocol**

|                           | T1-weighted imaging |     |                 |     | T2-weighted imaging |      | Phase-contrast venous MRA |     | TOF arterial MRA |     |
|---------------------------|---------------------|-----|-----------------|-----|---------------------|------|---------------------------|-----|------------------|-----|
| <b>Acquisition</b>        |                     |     |                 |     |                     |      |                           |     |                  |     |
| <b>type</b>               | 2D                  |     | 3D              |     | 2D                  |      | 3D                        |     | 3D               |     |
| <b>Manufacturer</b>       | Philips             |     | Philips         |     | Philips             |      | Philips                   |     | Philips          |     |
| <b>Tesla</b>              | 1.5                 | 3   | 1.5             | 3   | 1.5                 | 3    | 1.5                       | 3   | 1.5              | 3   |
| <b>Repetition</b>         |                     |     |                 |     |                     |      |                           |     |                  |     |
| <b>time</b>               | 800                 | 700 | 420             | 600 | 6000                | 6000 | 14                        | 11  | 17               | 23  |
| <b>Echo time</b>          | 12                  | 14  | 18              | 25  | 140                 | 160  | 6.1                       | 7   | 6.9              | 4   |
| <b>Flip angle</b>         | 70                  | 70  | 80              | 90  | 90                  | 90   | 10                        | 10  | 20               | 18  |
| <b>Slice thickness</b>    | 4                   | 2   | 1               | 1   | 3                   | 2    | 1.6                       | 1.6 | 1.4              | 1.2 |
| <b>Acquisition matrix</b> | 230 x 200 x 163     |     | 256 x 196 x 256 |     | 196 x 196 x 512     |      | 360 x 289 x 144           |     | 268 x 207 x 400  |     |
| <b>Voxel</b>              |                     |     |                 |     |                     |      |                           |     |                  |     |
| <b>dimension</b>          | 1                   | 1   | 1               | 1   | 0.4                 | 0.4  | 1.4                       | 0.9 | 0.6              | 0.3 |
| <b>Spacing</b>            |                     |     |                 |     |                     |      |                           |     |                  |     |
| <b>between slices</b>     | 3.3                 | 2.2 | 1               | 0.5 | 3.3                 | 2.2  | 0.8                       | 0.8 | 0.7              | 0.6 |
|                           |                     |     |                 |     |                     |      | PC velocity               |     | PC velocity      |     |
| <b>Other</b>              |                     |     |                 |     |                     |      | 15cm/s                    |     | 13cm/s           |     |

**Legend:** MRA, Magnetic resonance angiography; PC, phase contrast

## Online Resource 2

**Supplementary Figure 1. 3D slicer segmentation of the VGAM pouch using four MRI sequences of a neonatal case with VGAM.** Sagittal T1-weighted (a), T2-weighted (b), arterial TOF MR angiography (c) and venous phase-contrast MR angiography (d) images with corresponding 3D segmentation of the VGAM pouch (e-h). Note that the best results are provided by the venous MRA images.

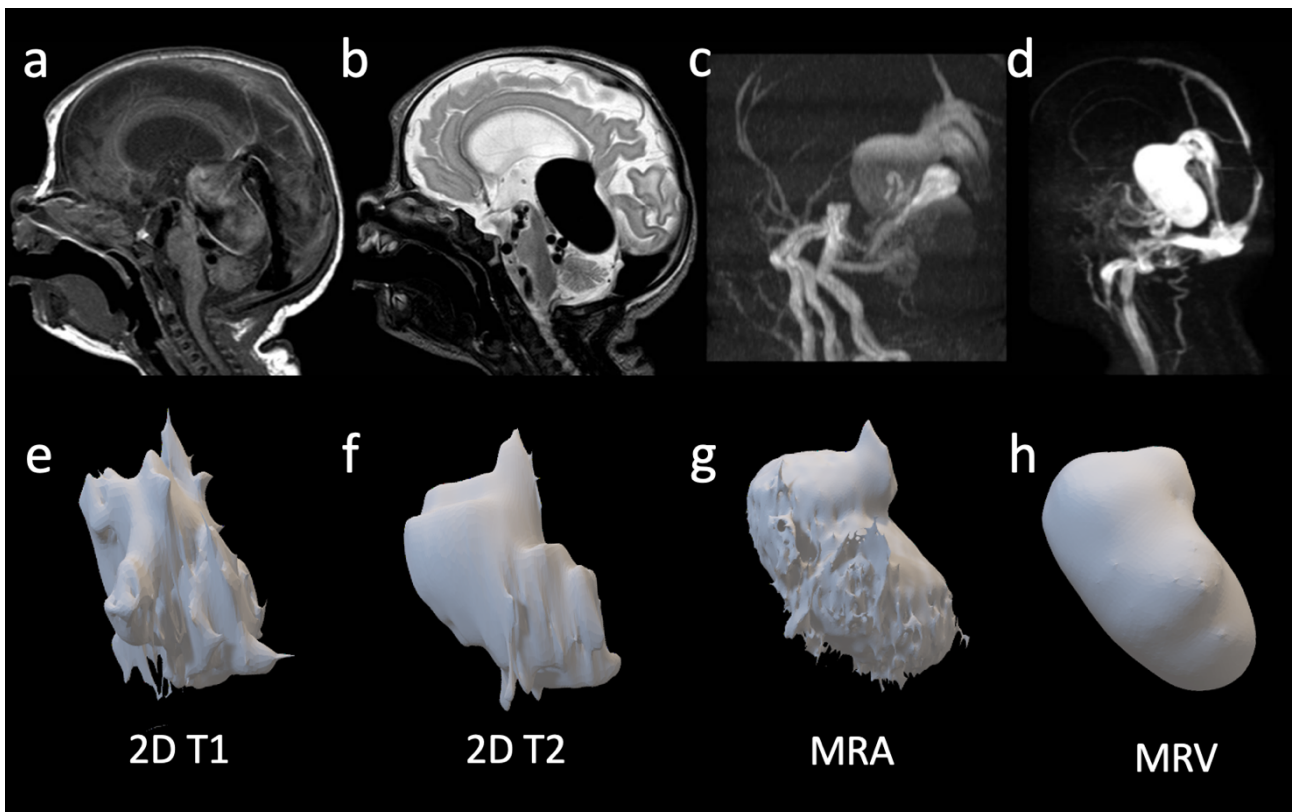

### Online Resource 3

**Supplementary Figure 2.** Graph showing results of repeated measures of the VGAM pouch volume for the two investigated methods performed by one Reader.

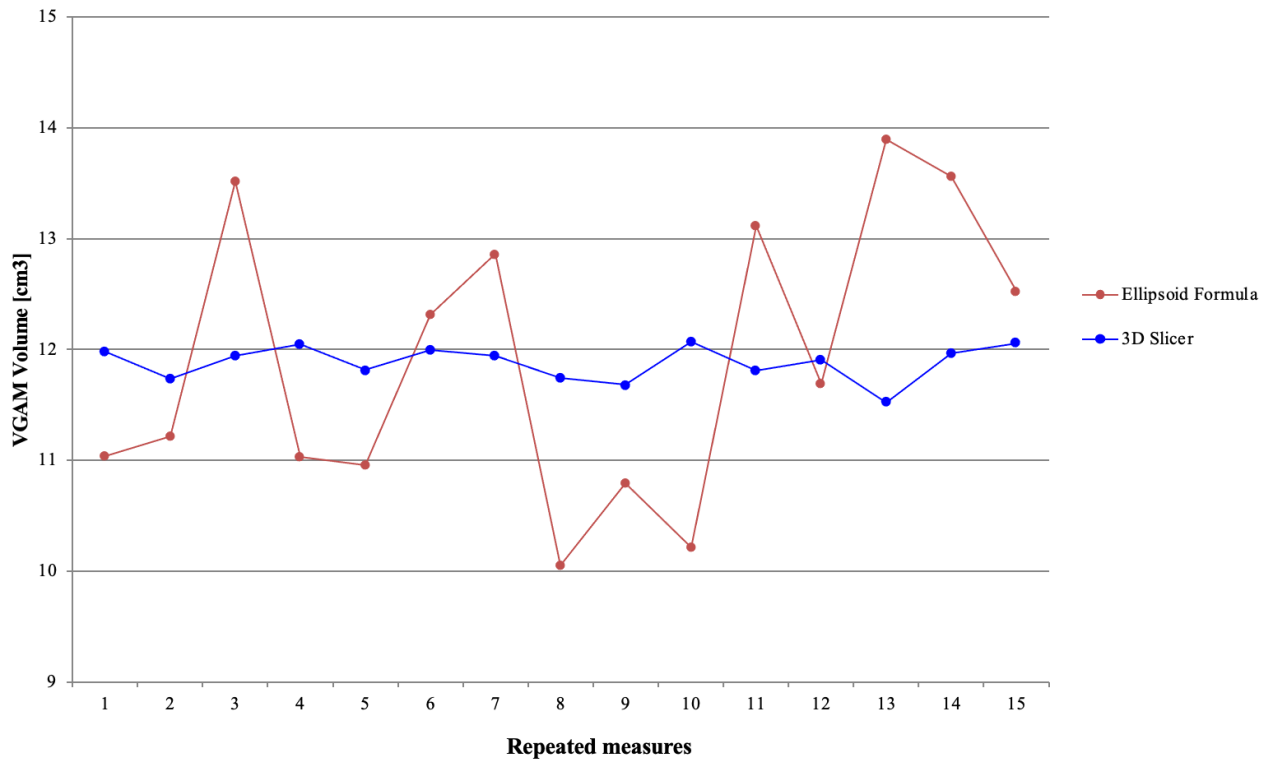

## Online Resource 4

**Supplementary Table 2. Description of the POPC (Paediatric Overall Performance Category) scale items**

| <b>POPC category</b>            | <b>Description</b>                                                                                                                                                                                                                                                                                          |
|---------------------------------|-------------------------------------------------------------------------------------------------------------------------------------------------------------------------------------------------------------------------------------------------------------------------------------------------------------|
| <b>1. Normal</b>                | Performs at age-appropriate level in daily living activities. Medical or physical problems do not interfere with normal activity.                                                                                                                                                                           |
| <b>2. Mild disability</b>       | Mild medical or physical problems causing minor limitations that do not interfere with normal life (e.g., asthma). Pre-school child: may present disabilities compatible with future independent life (e.g., single amputation) and is able to perform over 75% of age-appropriate daily living activities. |
| <b>3. Moderate disability</b>   | Medical or physical problems interfere with normal activity. Pre-school child: unable to perform some daily living activities. School-age child: able to perform multiple daily living activities but presents physical disability (e.g., cannot participate in sports competitions).                       |
| <b>4. Severe disability</b>     | Pre-school child: unable to perform most daily living activities. Pre-school child: dependent for most daily living activities.                                                                                                                                                                             |
| <b>5. Coma/vegetative state</b> | Unconscious. Unaware. Unable to interact verbally or cognitively with the environment.                                                                                                                                                                                                                      |
| <b>6. Brain death</b>           | Brain death                                                                                                                                                                                                                                                                                                 |

## Online Resource5

**Supplementary Table 3. Medical treatment and intensive care support**

| <b>Pre embolization (n=39)</b> | <b>yes (%)</b> | <b>no (%)</b> |
|--------------------------------|----------------|---------------|
| Epinephrine                    | 18 (46)        | 21 (54)       |
| Milrinone                      | 18 (46)        | 21 (54)       |
| Levosimendan                   | 3 (8)          | 36 (92)       |
| PGE1                           | 5 (13)         | 34 (87)       |
| Diuretic                       | 18 (46)        | 21 (54)       |
